# Supplementary material for: Controlled one-step synthesis of Pt decorated octahedral Fe3O4and its excellent catalytic performance for CO oxidation
Source: Royal Society of Chemistry journal article supplement (doi:10.1039/c5nr05933j), 2015-01-01
Supplement: c5nr05933j1.pdf [file c5nr05933j1.pdf]

# Supporting Information

## Controlled One-step Synthesis of Pt decorated Octahedral $\text{Fe}_3\text{O}_4$ and Its Excellent Catalytic Performance for CO Oxidation

Gengnan Li<sup>a</sup>, Liang Li<sup>a,\*</sup>, Binghan Wu<sup>a</sup>, Jinxia Li<sup>b</sup>, Yuan Yuan<sup>a</sup>, Jianlin Shi<sup>a,c,\*</sup>

<sup>a</sup> Key Laboratory for Ultrafine Materials of Ministry of Education, School of Materials Science and Engineering, East China University of Science and Technology, Shanghai 200237, China

<sup>b</sup> Research Center of Analysis and Test, East China University of Science and Technology, Shanghai 200237, China

<sup>c</sup> State Key Laboratory of High Performance Ceramic and Superfine Microstructure, Shanghai Institute of Ceramics, Chinese Academy of Sciences, Shanghai 200050, China

E-mail: liliang@ecust.edu.cn; jlshi@mail.sic.ac.cn; Tel: +86-21-64252599; Fax: +86-21-64250740

### 1. The structural analysis of the catalysts

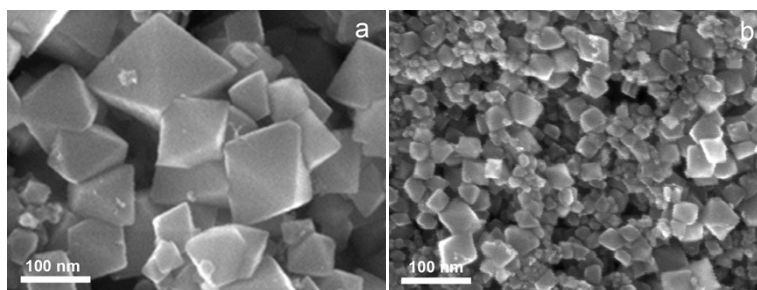

**Fig. S1** SEM images of 0.47 wt% Pt/Fe<sub>3</sub>O<sub>4</sub> (a) and 2.3 wt% Pt/Fe<sub>3</sub>O<sub>4</sub> (b).

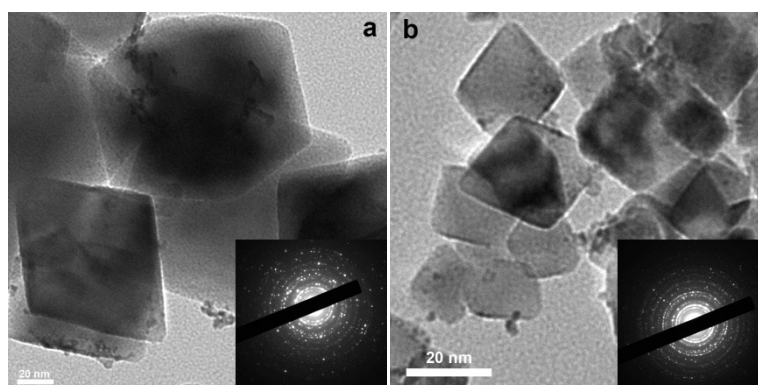

**Fig. S2** TEM images of 0.47 wt% Pt/Fe<sub>3</sub>O<sub>4</sub> (a) and 2.3 wt% Pt/Fe<sub>3</sub>O<sub>4</sub> (b).

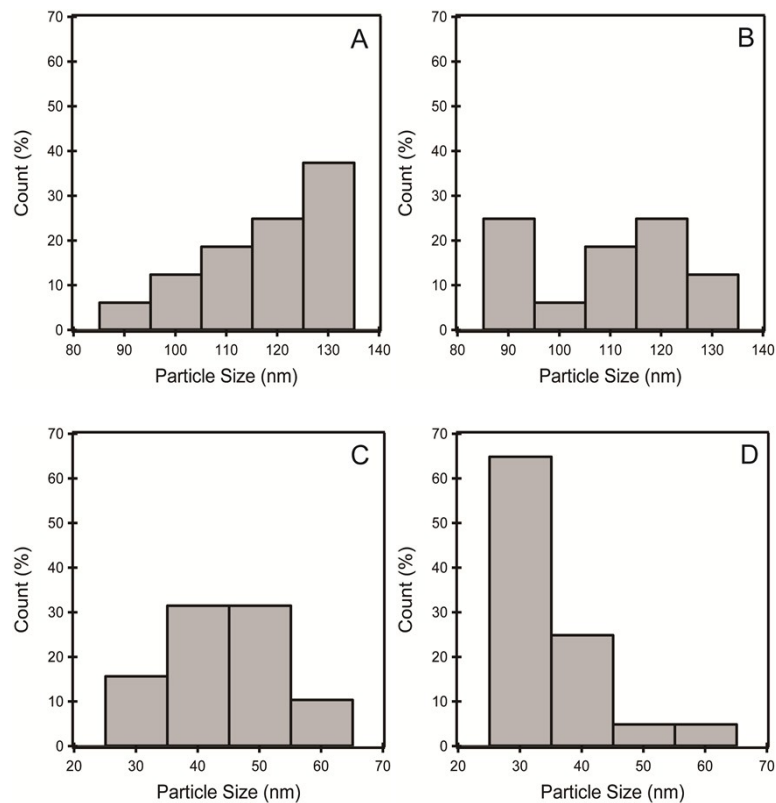

**Fig. S3** Particle size distributions of  $\text{Fe}_3\text{O}_4$  support and Pt/ $\text{Fe}_3\text{O}_4$  catalysts with varied Pt loading amounts: 0 wt% (A), 0.47 wt% (B), 1.4 wt% (C) and 2.3 wt% (D).

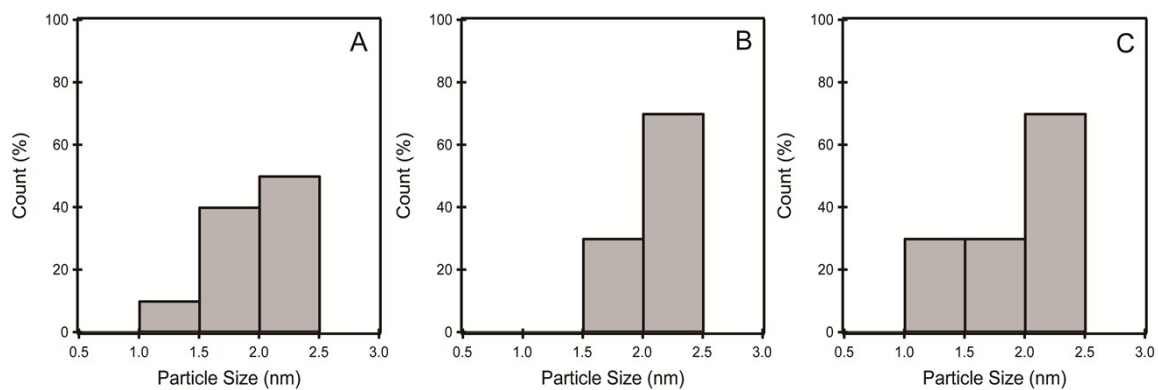

**Fig. S4** Particle size distributions of Pt in Pt/ $\text{Fe}_3\text{O}_4$  catalysts with varied Pt loading amounts: 0.47 wt% (A), 1.4 wt% (B) and 2.3 wt% (C).

## 2. The structural characterizations of catalyst after catalytic testing under different conditions.

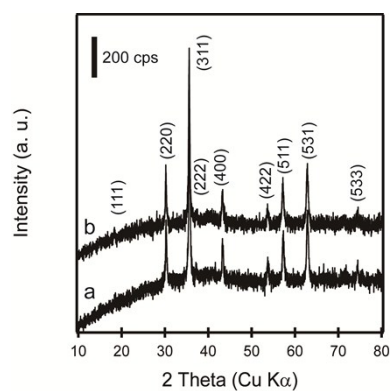

**Fig. S5** XRD patterns of 1.4 wt% Pt/Fe<sub>3</sub>O<sub>4</sub> catalyst after reaction under dry (a) and moisture (b) conditions.

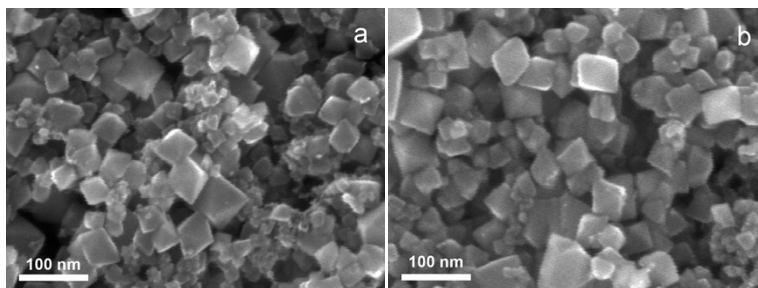

**Fig. S6** SEM images of 1.4 wt% Pt/Fe<sub>3</sub>O<sub>4</sub> catalyst after reaction under dry (a) and moisture (b) conditions.

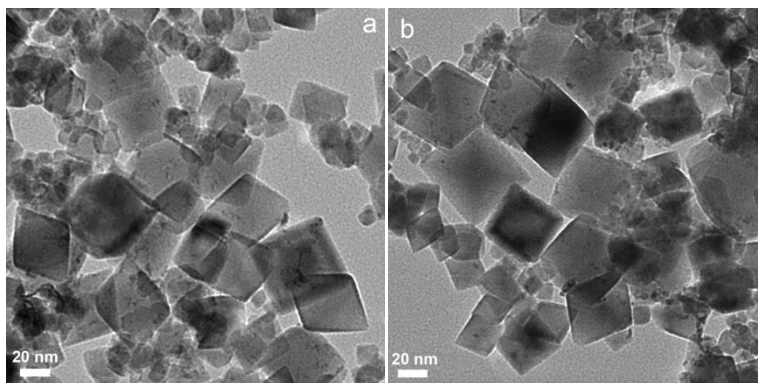

**Fig. S7** TEM images of 1.4 wt% Pt/Fe<sub>3</sub>O<sub>4</sub> catalyst after reaction under dry (a) and moisture (b) conditions.

### 3. The effect of the concentration of O<sub>2</sub> during the CO oxidation process

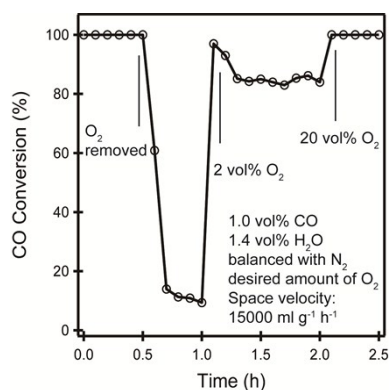

**Fig. S8** The effect of O<sub>2</sub> during the CO oxidation reaction.

The catalyst shows relatively high water resistance when the water was introduced into the feed gas. In order to exclude the effect of the water gas shift reaction, the effect of O<sub>2</sub> concentration was employed as shown in Fig. S8. The CO conversion decreases from 100% to 15% in the presence of water, when the O<sub>2</sub> was removed from the feed gas at 25 °C. After 2.0 vol% O<sub>2</sub> introduced into the feed gas, the CO conversion increased to 90% and keep at 85% unchanged. Further increases the O<sub>2</sub> concentration, the CO conversion recover to 100% again. This result demonstrates that the effect of WGSR can be ignored during the CO oxidation reaction.

### 4. The reusability and stability test for 1.4 wt% Pt/Fe<sub>3</sub>O<sub>4</sub> catalyst under dry and moisture conditions

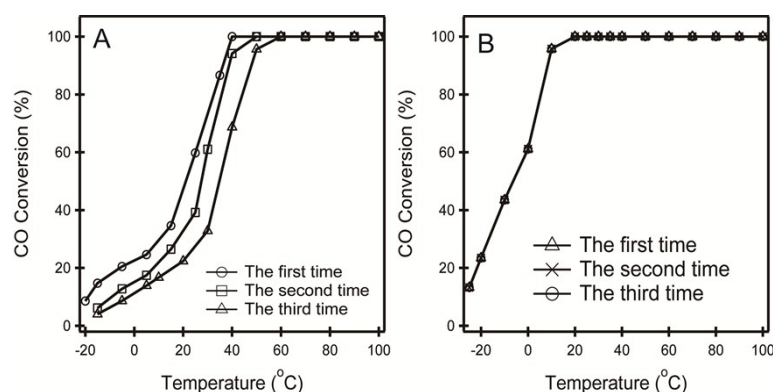

**Fig. S9** Catalytic performances of 1.4 wt% Pt/Fe<sub>3</sub>O<sub>4</sub> catalyst for CO oxidation under dry (A) (Reaction condition: 1.0 vol% CO, 20.0 vol% O<sub>2</sub> balanced with N<sub>2</sub>; Space velocity: 15000 ml g<sup>-1</sup> h<sup>-1</sup>) and moisture (B) conditions. (Reaction condition: 1.0 vol% CO, 20.0 vol% O<sub>2</sub>, 1.4 vol% H<sub>2</sub>O balanced with N<sub>2</sub>; Space velocity: 15000 ml g<sup>-1</sup> h<sup>-1</sup>)

The reusability test for the 1.4 wt% Pt/Fe<sub>3</sub>O<sub>4</sub> catalyst are shown in Fig. S9. A slightly decrease of the catalytic activity could be found under dry condition, while the CO conversion keep unchanged under moisture condition. These results indicate that the 1.4 wt% Pt loaded Fe<sub>3</sub>O<sub>4</sub> catalyst is more stable under moisture conditions.

### 5. The effect of pre-treatment for CO oxidation

The 1.4 wt% Pt/Fe<sub>3</sub>O<sub>4</sub> catalyst after pre-treatment at 200 °C and 400 °C under air atmosphere for 2 h were labeled as Pt/Fe<sub>3</sub>O<sub>4</sub>-200 and Pt/Fe<sub>3</sub>O<sub>4</sub>-400. The 1.4 wt% Pt/Fe<sub>3</sub>O<sub>4</sub> catalyst after pre-treatment at 200 °C and under H<sub>2</sub> atmosphere for 2 h was labeled as Pt/Fe<sub>3</sub>O<sub>4</sub>-H<sub>2</sub>.

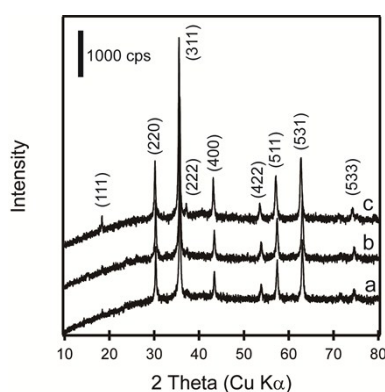

**Fig. S10** XRD patterns of Pt/Fe<sub>3</sub>O<sub>4</sub>-200 (a), Pt/Fe<sub>3</sub>O<sub>4</sub>-400 (b) and Pt/Fe<sub>3</sub>O<sub>4</sub>-H<sub>2</sub> (c).

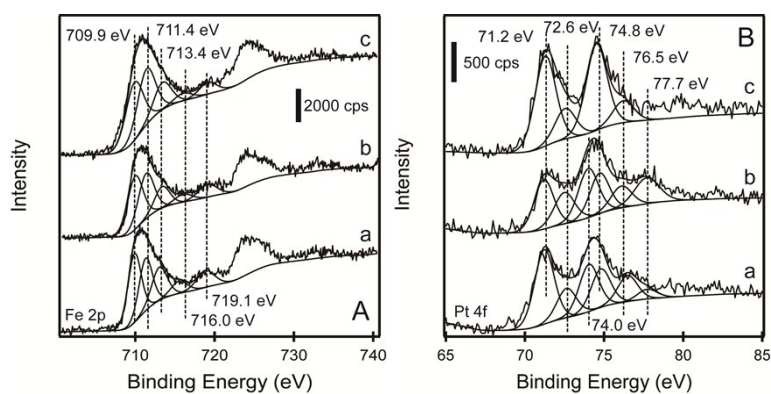

**Fig. S11** XPS spectra of Fe 2p (A) and Pt 4f (B) for Pt/Fe<sub>3</sub>O<sub>4</sub>-200 (a), Pt/Fe<sub>3</sub>O<sub>4</sub>-400 (b) and Pt/Fe<sub>3</sub>O<sub>4</sub>-H<sub>2</sub> (c).

**Table S1** The composition (%) of the Fe<sub>3</sub>O<sub>4</sub> support and 1.4 wt% Pt loaded Pt/Fe<sub>3</sub>O<sub>4</sub> catalyst

| Sample                                            | Fe                   |                      | O (%) | Pt                  |                      |                      |
|---------------------------------------------------|----------------------|----------------------|-------|---------------------|----------------------|----------------------|
|                                                   | Fe <sup>2+</sup> (%) | Fe <sup>3+</sup> (%) |       | Pt <sup>0</sup> (%) | Pt <sup>2+</sup> (%) | Pt <sup>4+</sup> (%) |
| Fe <sub>3</sub> O <sub>4</sub>                    | 9.0                  | 10.5                 | 80.5  | -                   | -                    | -                    |
| Pt/Fe <sub>3</sub> O <sub>4</sub>                 | 6.8                  | 10.4                 | 81.3  | 0.9                 | 0.4                  | 0.2                  |
| Pt/Fe <sub>3</sub> O <sub>4</sub> -200            | 8.0                  | 10.9                 | 79.4  | 0.9                 | 0.4                  | 0.4                  |
| Pt/Fe <sub>3</sub> O <sub>4</sub> -400            | 7.2                  | 9.5                  | 81.6  | 0.7                 | 0.4                  | 0.6                  |
| Pt/Fe <sub>3</sub> O <sub>4</sub> -H <sub>2</sub> | 7.4                  | 10.6                 | 80.4  | 1.3                 | 0.3                  | -                    |

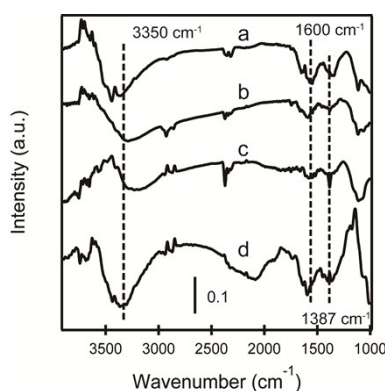**Fig. S12** FT-IR spectra of 1.4 wt% Pt/Fe<sub>3</sub>O<sub>4</sub> catalyst (a) and Pt/Fe<sub>3</sub>O<sub>4</sub>-200 (b), Pt/Fe<sub>3</sub>O<sub>4</sub>-400 (c) and Pt/Fe<sub>3</sub>O<sub>4</sub>-H<sub>2</sub> (d).

The FT-IR spectra of 1.4 wt% Pt loaded catalyst pre-treated under different conditions were shown in Fig. S12. The broad and strong band at 2800-3800 cm<sup>-1</sup> can be assigned as the stretching vibration of OH groups and adsorbed water on Fe<sub>3</sub>O<sub>4</sub>, and the less strong band centered at 1600 cm<sup>-1</sup> can be ascribed to the deformation vibration of OH groups on carboxyl species.<sup>1-3</sup> In addition, the carbonate-type species appeared at 1387 cm<sup>-1</sup>. The intensities of all these bands concerned with -OH groups decrease after that pre-treated at higher temperature, indicating the removal of physisorbed water and dehydroxylation. However, the intensity of these bands show slightly increases when the catalyst pretreated under H<sub>2</sub> atmosphere at 200 °C. This may attributed to the formation of H<sub>2</sub>O which can be easily absorbed on the surface of the catalyst during the reduction process. This result is in agreement with the XPS analysis.

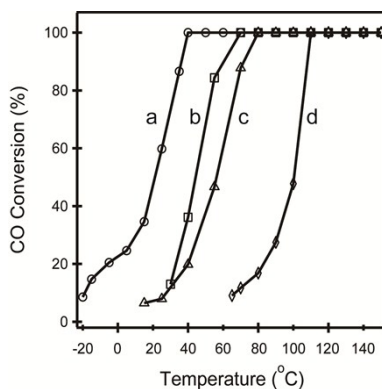

**Fig. S13** Catalytic activities of 1.4 wt% Pt/Fe<sub>3</sub>O<sub>4</sub> catalyst (a) and Pt/Fe<sub>3</sub>O<sub>4</sub>-200 (b), Pt/Fe<sub>3</sub>O<sub>4</sub>-400 (c) and Pt/Fe<sub>3</sub>O<sub>4</sub>-H<sub>2</sub> (d) under dry condition.

(Feed gas: 1.0 vol% CO, 20.0 vol% O<sub>2</sub> balanced with N<sub>2</sub>; WHSV=15,000 ml/g/h )

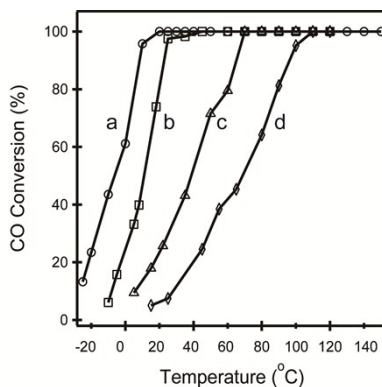

**Fig. S14** Catalytic activities of 1.4 wt% Pt/Fe<sub>3</sub>O<sub>4</sub> catalyst (a) and Pt/Fe<sub>3</sub>O<sub>4</sub>-200 (b), Pt/Fe<sub>3</sub>O<sub>4</sub>-400 (c) and Pt/Fe<sub>3</sub>O<sub>4</sub>-H<sub>2</sub> (d) under moisture condition.

(Feed gas: 1.0 vol% CO, 20.0 vol% O<sub>2</sub>, 1.4 vol% H<sub>2</sub>O balanced with N<sub>2</sub>; WHSV=15,000 ml/g/h )

The catalytic performance clearly indicate that the catalyst without pre-treatment shows the higher catalytic activity for CO oxidation whatever under dry or moisture conditions.

## 5. The comparison of the present work with others

**Table S2** Comparison of the catalyst performance over different noble-metal supported catalysts for CO oxidation reported previously

| Catalysts                                         | Noble metal loading (wt %) | CO/H <sub>2</sub> O concentration (vol %) | Space velocity (ml h <sup>-1</sup> g <sub>cat</sub> <sup>-1</sup> ) | Temperature of 100% CO conversion (°C) | Note      |
|---------------------------------------------------|----------------------------|-------------------------------------------|---------------------------------------------------------------------|----------------------------------------|-----------|
| Pd/FeO <sub>x</sub>                               | 5.4                        | 1.0/0.0                                   | 15,000                                                              | 10                                     | Ref 4     |
| Pd/FeO <sub>x</sub>                               | 9.1                        | 1.0/0.0                                   | 15,000                                                              | -20                                    | Ref 4     |
| Pt/Al <sub>2</sub> O <sub>3</sub>                 | 0.4                        | 1.0/0.0                                   | 15,000                                                              | 150                                    | Ref 5     |
| Pt/SiO <sub>2</sub>                               | 2                          | 1.0/0.0                                   | 15,000                                                              | > 100                                  | Ref 6     |
| Pt/TiO <sub>2</sub>                               | 1.0                        | 1.0/0.0                                   | 15,000                                                              | 27                                     | Ref 6     |
| Pt/NiO                                            | 1.0                        | 0.5/1.8                                   | 120000                                                              | 100                                    | Ref.7     |
| Pt/ZnO                                            | 1.0                        | 0.5/1.8                                   | 120000                                                              | 50                                     | Ref.7     |
| Pt/Al <sub>2</sub> O <sub>3</sub>                 | 1.0                        | 0.5/1.8                                   | 120000                                                              | 80                                     | Ref.7     |
| Ir/FeO <sub>x</sub>                               | 1.2                        | 1.0/0.0                                   | 18,000                                                              | 40-70                                  | Ref. 8    |
| Pt <sub>1</sub> /FeO <sub>x</sub>                 | 2.5                        | 1.0/0                                     | 18,750                                                              | ~ 80                                   | Ref. 9    |
| Pt/Fe <sub>3</sub> O <sub>4</sub>                 | 2.25                       | 1.0/0                                     | 44,400                                                              | 100                                    | Ref. 10   |
| Fe <sub>3</sub> O <sub>4</sub>                    | 0                          | 1.0/0.0                                   | 15,000                                                              | 120                                    | This work |
| Pt/Fe <sub>3</sub> O <sub>4</sub>                 | 0.47                       | 1.0/0.0                                   | 15,000                                                              | 80                                     | This work |
| Pt/Fe <sub>3</sub> O <sub>4</sub>                 | 1.4                        | 1.0/0.0                                   | 15,000                                                              | 40                                     | This work |
| Pt/Fe <sub>3</sub> O <sub>4</sub>                 | 2.3                        | 1.0/0.0                                   | 15,000                                                              | 0                                      | This work |
| Pt/Fe <sub>3</sub> O <sub>4</sub> -200            | 1.4                        | 1.0/0.0                                   | 15,000                                                              | 60                                     | This work |
| Pt/Fe <sub>3</sub> O <sub>4</sub> -400            | 1.4                        | 1.0/0.0                                   | 15,000                                                              | 80                                     | This work |
| Pt/Fe <sub>3</sub> O <sub>4</sub> -H <sub>2</sub> | 1.6                        | 1.0/0.0                                   | 15,000                                                              | 100                                    | This work |
| Pt/Fe <sub>3</sub> O <sub>4</sub>                 | 1.4                        | 1.0/1.4                                   | 15,000                                                              | 20                                     | This work |
| Pt/Fe <sub>3</sub> O <sub>4</sub> -200            | 1.4                        | 1.0/1.4                                   | 15,000                                                              | 40                                     | This work |
| Pt/Fe <sub>3</sub> O <sub>4</sub> -400            | 1.4                        | 1.0/1.4                                   | 15,000                                                              | 70                                     | This work |
| Pt/Fe <sub>3</sub> O <sub>4</sub> -H <sub>2</sub> | 1.6                        | 1.0/1.4                                   | 15,000                                                              | 110                                    | This work |



## 6. The hysteresis loops of the Fe<sub>3</sub>O<sub>4</sub> nanoparticles

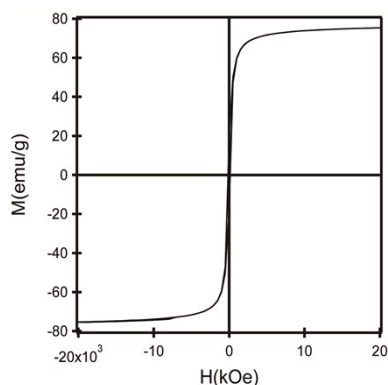

**Fig. S15** Hysteresis loops of as prepared octahedral Fe<sub>3</sub>O<sub>4</sub> nanoparticles measured at 300K.

### Reference:

- 1 G. Šmit, S. Zrnčević, K. Lázár, *J. Mol. Catal. A*, 2006, **252**, 103.
- 2 A.P. Kozlova, S. Sugiyama, A.I. Kozlov, K. Asakura, Y. Iwasawa, *J. Catal.*, 1998, **176**, 426.
- 3 B. Qiao, A. Wang, J. Lin, L. Li, D. Su, T. Zhang, *Appl. Catal. B*, 2011, **105**, 103.
- 4 L. Liu, B. Qiao, Y. He, F. Zhou, B. Yang, Y. Deng, *J. Catal.*, 2012, **294**, 29–36.
- 5 Liu, L.; Zhou, F.; Wang, L.; Qi, X.; Shi, F.; Deng, Y.; *J. Catal.*, 2010, **274**, 1–10.
- 6 F. J. Gracia, L. Bollmann, E. E. Wolf, J. T. Miller, A. J. Kropf, *J. Catal.*, 2003, **220**, 382–391
- 7 S. Li, G. Liu, H. Lian, Mi. Jia, G. Zhao, D. Jiang, W. Zhang, *Catal. Comm.*, 2008, **9**, 1045–1049.
- 8 G. R. Bamwenda, S. Tsubota, T. Nakamura, M. Haruta, *Catal. Lett.*, 1997, **44**, 83–87.
- 9 C. Wang, H. Yin, S. Dai, S. Sun, *Chem. Mater.*, 2010, **22**, 3277–3282.
- 10 B. Qiao, A. Wang, X. Yang, L. F. Allard, Z. Jiang, Y. Cui, J. Liu, J. Li, T. Zhang, *Nature Chemistry*, 2011, **3**, 634–641.
